# Supplementary material
Source: PubMed Central journal article supplement (PMC5392584)

Supplemental Tables

Table S1. Table S1. Many of the malectin RLKs in the same subfamily as FERONIA contain the A/GXXXA/G motif, putatively for transmembrane domain association.

| Id        | Name      | Uniprot | TM reg. | TM sequence                                                                                                            | VDW      | HBOND    | TOTAL     |
|-----------|-----------|---------|---------|------------------------------------------------------------------------------------------------------------------------|----------|----------|-----------|
| AT3G04690 | ANXUR1    | Q9SR05  | 430-450 | <b>A</b> EII <b>G</b> SAG <b>G</b> V <b>L</b> A <b>V</b> L <b>I</b> GAL <b>C</b> F <b>T</b>                            | -31.0535 | -13.8915 | -44.94500 |
| AT5G28680 | ANXUR2    | Q3E8W4  | 432-452 | I <b>T</b> A <b>F</b> V <b>I</b> G <b>S</b> A <b>G</b> G <b>V</b> A <b>A</b> V <b>L</b> F <b>C</b> A <b>L</b> C        | -39.8268 | -9.1564  | -48.98328 |
| AT3G51550 | FERONIA   | Q9SCZ4  | 448-468 | I <b>I</b> A <b>G</b> A <b>A</b> S <b>G</b> A <b>V</b> V <b>L</b> A <b>L</b> I <b>I</b> G <b>F</b> C <b>V</b> F        | -26.1953 | -15.5915 | -41.78680 |
| AT3G46290 | HERCULES1 | Q9LX66  | 406-426 | L <b>I</b> V <b>G</b> S <b>A</b> I <b>G</b> S <b>L</b> L <b>A</b> V <b>V</b> F <b>L</b> G <b>S</b> C <b>F</b> V        | -39.0302 | -6.4260  | -45.45628 |
| AT5G59700 |           | Q9FN92  | 407-427 | I <b>I</b> G <b>L</b> T <b>I</b> G <b>S</b> L <b>L</b> A <b>L</b> V <b>V</b> L <b>G</b> G <b>F</b> F <b>V</b> L        | -38.9866 | -4.7651  | -43.75173 |
| AT2G39360 |           | O80623  | 408-428 | V <b>G</b> L <b>I</b> A <b>G</b> L <b>S</b> A <b>A</b> L <b>C</b> V <b>A</b> L <b>V</b> F <b>G</b> V <b>V</b> V        | -34.6008 | -8.5028  | -43.10366 |
| AT4G39110 |           | Q9T020  | 441-461 | M <b>V</b> A <b>T</b> A <b>G</b> F <b>V</b> M <b>M</b> F <b>G</b> A <b>F</b> I <b>G</b> L <b>G</b> A <b>M</b> V        | -32.0543 | -24.2691 | -56.32340 |
| AT2G21480 |           | Q9SJT0  | 440-460 | M <b>V</b> A <b>T</b> A <b>G</b> F <b>V</b> M <b>M</b> F <b>G</b> A <b>F</b> V <b>G</b> L <b>G</b> A <b>M</b> V        | -32.4248 | -24.0164 | -56.44120 |
| AT5G61350 | ERULUS    | Q9FLJ8  | 426-446 | I <b>A</b> G <b>I</b> G <b>F</b> V <b>M</b> A <b>L</b> T <b>A</b> F <b>L</b> G <b>V</b> V <b>V</b> L <b>L</b> V        | -35.0172 | -5.8159  | -40.83310 |
| AT5G54380 | THESEUS1  | Q9LK35  | 416-436 | <b>A</b> V <b>I</b> I <b>G</b> S <b>L</b> V <b>G</b> A <b>V</b> T <b>L</b> I <b>L</b> L <b>I</b> A <b>V</b> C <b>C</b> | -30.6328 | -9.9691  | -40.60194 |
| AT5G24010 |           | Q9FLW0  | 407-427 | V <b>V</b> W <b>I</b> V <b>V</b> G <b>S</b> V <b>L</b> G <b>G</b> F <b>V</b> F <b>L</b> S <b>L</b> F <b>F</b> L        | -48.5259 | -11.7605 | -60.28640 |
| AT1G30570 | HERCULES2 | Q9SA72  | 430-450 | I <b>I</b> W <b>I</b> S <b>V</b> G <b>A</b> G <b>I</b> A <b>I</b> I <b>I</b> F <b>F</b> V <b>F</b> L <b>G</b> I        | -76.0560 | -5.8364  | -81.89244 |
| AT2G23200 |           | O22187  | 406-426 | C <b>A</b> V <b>A</b> A <b>A</b> A <b>S</b> A <b>L</b> V <b>F</b> S <b>L</b> L <b>F</b> M <b>V</b> F <b>L</b>          | -16.5211 | 5.7695   | -10.75156 |
| AT5G39000 |           | Q9FID8  | 446-466 | L <b>A</b> V <b>V</b> G <b>S</b> L <b>V</b> V <b>L</b> A <b>M</b> F <b>V</b> V <b>G</b> V <b>L</b> V <b>I</b> M        | -18.8988 | 0.2550   | -18.64379 |
| AT5G38990 |           | Q9FID9  | 441-461 | I <b>I</b> I <b>A</b> V <b>V</b> G <b>S</b> A <b>V</b> A <b>L</b> A <b>F</b> F <b>V</b> L <b>V</b> V <b>L</b>          | -32.2886 | -8.0407  | -40.32937 |
| AT5G39020 |           | Q9FID6  | 438-458 | L <b>V</b> I <b>I</b> L <b>I</b> V <b>V</b> G <b>S</b> V <b>I</b> G <b>L</b> A <b>T</b> F <b>I</b> V <b>I</b>          | -32.7719 | -8.9597  | -41.73161 |
| AT5G39030 |           | Q9FID5  | 444-464 | I <b>F</b> I <b>A</b> V <b>G</b> P <b>G</b> T <b>G</b> L <b>A</b> T <b>F</b> V <b>V</b> L <b>M</b> L <b>N</b>          | -42.0533 | -12.0869 | -54.14020 |

Table S2. Sequences of primers used for cloning.

| <b>Primer Table</b>                      |                         |                                             |                                                 |
|------------------------------------------|-------------------------|---------------------------------------------|-------------------------------------------------|
| <u>Experiment</u>                        | <u>Specific Primers</u> | <u>Sequence Forward (5'→3')</u>             | <u>Sequence Reverse (5'→3')</u>                 |
| Feronia into pEU cell-free vector        | cHIS_Feronia_cellfree   | cattctacaactacagccatgaagatcacagagggacgattcc | ctagtggatgatggatgatgacgtcccttggattcatgatc       |
| Feronia Truncations using Gibson Cloning | pEU_backbone_amp        | gtttaaacgaattcgagctcggtac                   | ggctgtagtgtagaatgtaaaa                          |
| Feronia Truncations using Gibson Cloning | KD_CT                   | attctacaactacagccatggatgaglccccgggtg        | gctcgaattcgtttaaacctagtggtgatggtgatg            |
| Feronia Truncations using Gibson Cloning | JM_KD_CT                | attctacaactacagccatgggtgcttaccgcaga         | gctcgaattcgtttaaacctagtggtgatggtgatg            |
| Feronia Truncations using Gibson Cloning | TM_JM_KD_CT             | attctacaactacagccatgattatgcaggcgcag         | gctcgaattcgtttaaacctagtggtgatggtgatg            |
| Feronia mutagenesis                      | Y495F                   | tgtgagttccaacagagatagtggaagccacct           | agggtggcttccactctctgtttgaaactcaca               |
| Feronia mutagenesis                      | K663R                   | catccaatagaaattgtgtcctcacatctctatggatgtgtg  | cacaatcatccatagagatgtagggacaacaaacattctattggatg |
| Feronia mutagenesis                      | K684R                   | tctagttaggaccagtctctgatagacaaaatcag         | ctgattttggctatcgaggactggtctacactaga             |
| Feronia mutagenesis                      | T696A                   | accacacacacgtaagcgcagttgtgaaaggaagt         | acttccttcacaactcgcttacgtgtgtgtgt                |
| Feronia mutagenesis                      | T696D                   | accgaaactccttcacaacatcgcttacctgtgtgtgtctag  | ctagaccacacacacgtaagcgcagttgtgaaaggaagtctcggt   |
| Feronia mutagenesis                      | K699R                   | ccgaaactccttcacaactgcttacctgtgt             | acacacgtaagcacagttgtgagaggaagtctcg              |
| Feronia mutagenesis                      | S701A                   | ctgggtcaagataaccgaaagctccttcacaactgtgctta   | taagcacagttgtgaaaggagcttcggttacctgaccag         |
| Feronia mutagenesis                      | S701D                   | tctgggtcaagataaccgaaatctccttcacaactgtgcttac | gtaagcacagttgtgaaaggagattcggttacctgaccagaga     |
| Feronia mutagenesis                      | S871A                   | atctctgctgccaagccctaccaccgatgctc            | gagcatcgggtgtagggcttggccagcgaagat               |
| Feronia mutagenesis                      | S871D                   | gaatctctgctgccaatccctaccaccgatgctcat        | atgagcatcgggtgtagggattggccagcgaagattc           |
| Feronia mutagenesis                      | S877A                   | gagtgagtcctatctgctctcgtggccaaact            | agtttggccagcgaagatgcagatggactcactc              |
| Feronia mutagenesis                      | S877D                   | gcacttggagtgagtcctatctctcgtggccaaactcc      | ggagtttggccagcgaagatgatgatggactcactccaagtgc     |

## Supplemental Figures

Figure S1. A, lipid optimization, step 1. MSP1C1-C-strep(II) was synthesized with liposomes or polymersomes (1.2 mg/mL or 1.6 mM) using WEPRO2240 at ambient temperature for 17 hours. Reactions were centrifuged (14 krpm, 18000 x g, for 3 min) to separate supernatant and pellet fractions. The supernatant was used for small-scale StrepTactin purification. The eluates were fractionated into supernatant (S) and pellet (P) by centrifuging at 14 krpm (18000 x g) for 3 min. S fractions of the eluates were analyzed on SDS-PAGE. B, lipid optimization, step 2. Proteins were synthesized with cardiolipin (CL) at varying concentrations, DDM, or phosphatidic acid (PA) using WEPRO2240 at ambient temperature for 24 hours, with the protocol as listed in (A). Post addition of CL was done after translation reaction and before centrifugation.

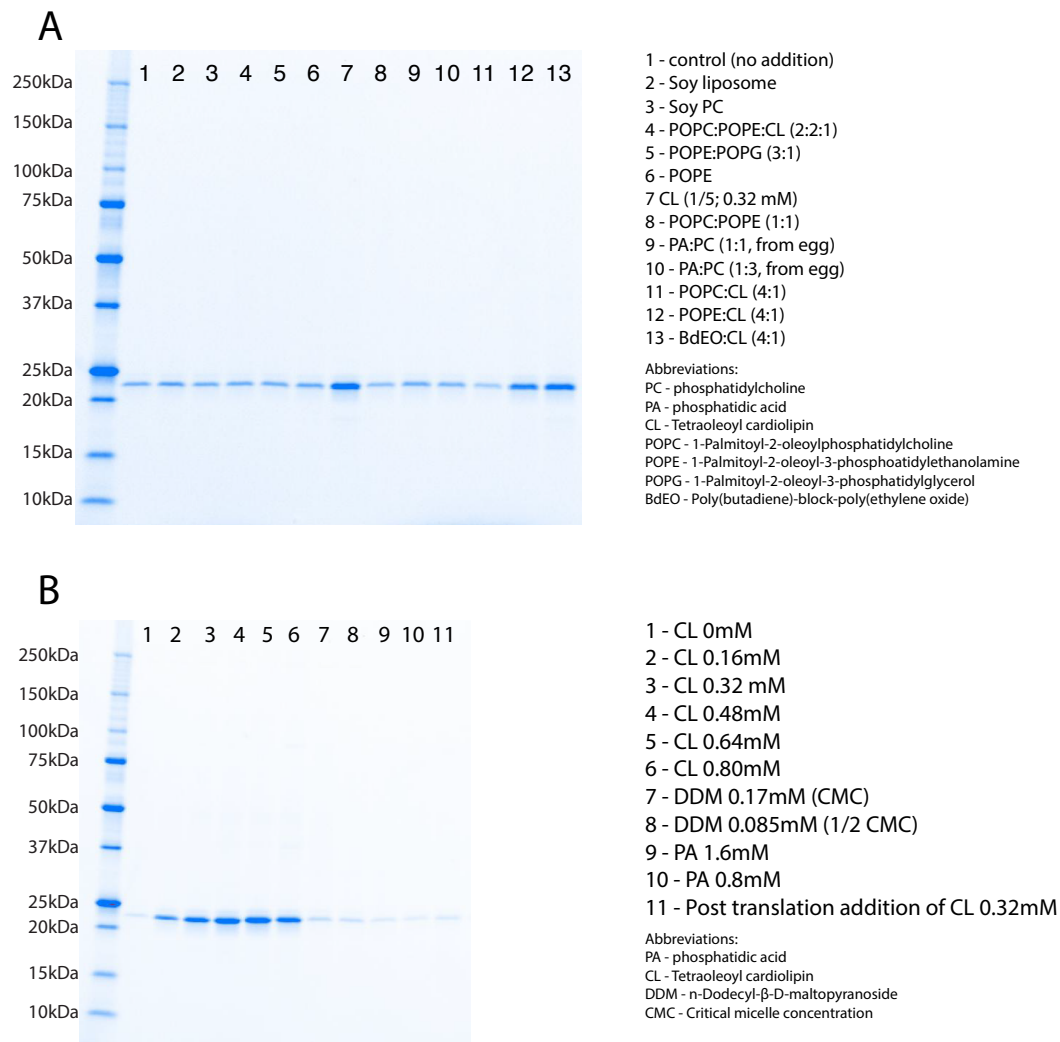

Figure S2. Affinity-purified FERONIA translated with MSP1D1 and cardiolipin as described above was diluted 50-fold into 18MΩ H<sub>2</sub>O and spotted onto 300 mesh carbon film grids (Electron Microscopy Sciences), negatively stained with Nano-W stain (Nanoprobes), and imaged on a Philips CM120 STEM Electron Microscope operating at 80KV. Image was collected with an AMT BioSprint 12 series digital camera using AMT Image Capture Software Engine V700. Magnification is represented by scale bar shown directly on sample image.

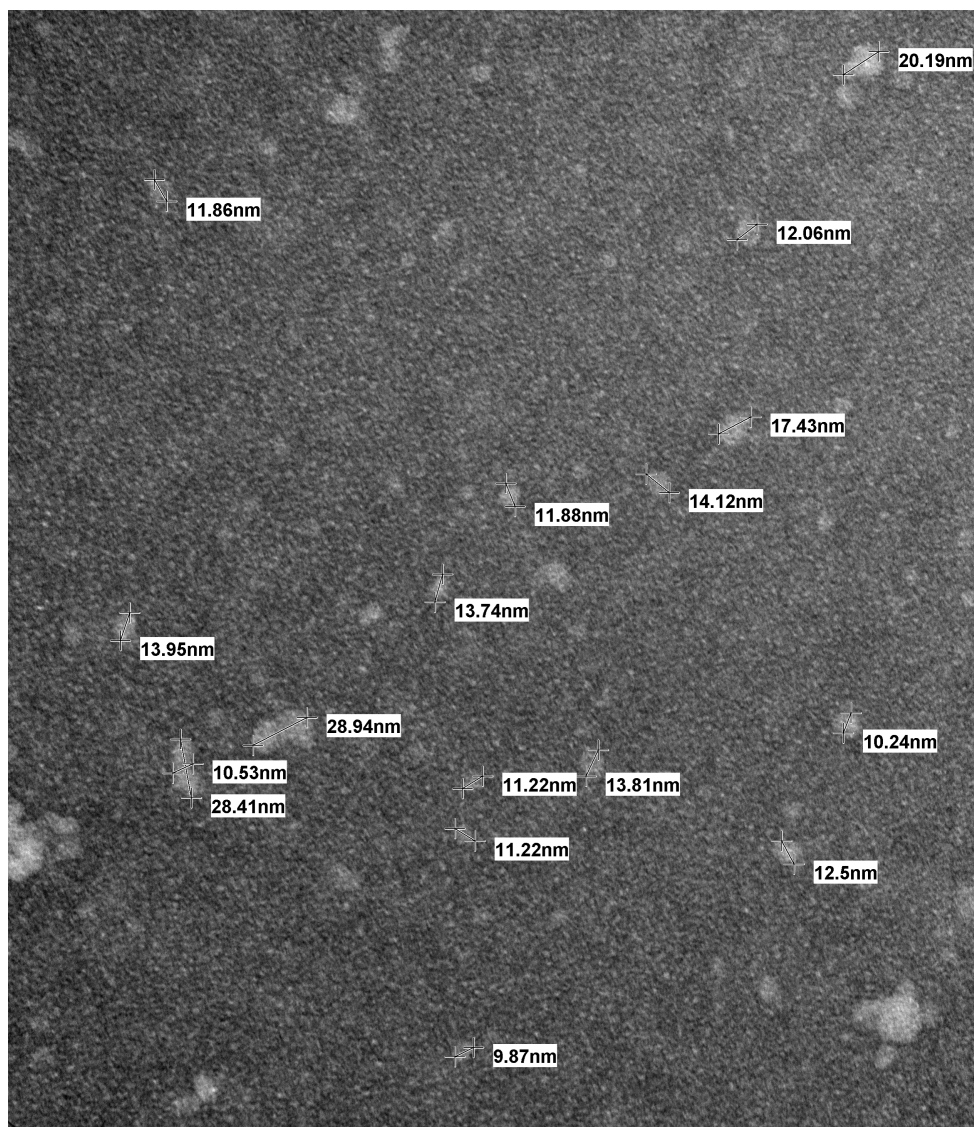

ferwt\_005  
Print Mag: 383000x @ 7.0 in  
14:59:10 9/27/2016  
Microscopist: AMT

50 nm 50nm  
HV=80.0kV  
Direct Mag: 230000x  
SMPH TEM LAB

Camera: BIOSPR12, Exposure(ms): 1000 Gain: 1.5, Bin: 1  
Gamma: 1.00, No Sharpening, Normal Contrast

Figure S3. Batches of produced mutational variants, with respective WT control expression and molecular weight ladders. A, B, and C refer to 3 independent batches.

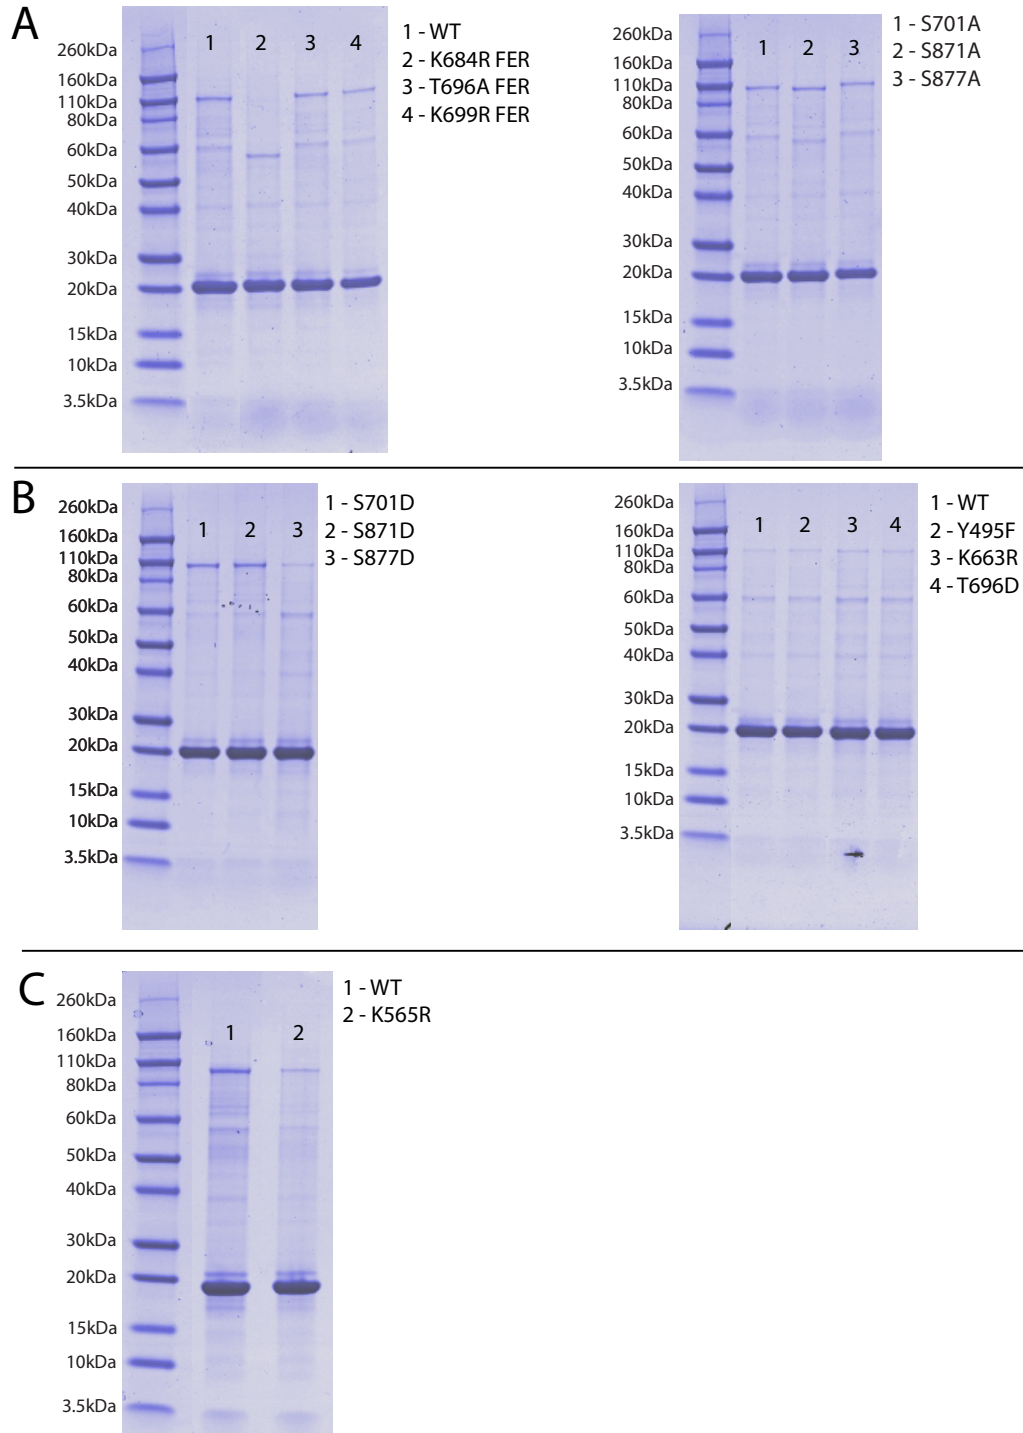

Supplement: 10.1074_M116.761981_jbc.M116.761981-1.pdf [file 10.1074_M116.761981_jbc.M116.761981-1.pdf]
